# Supplementary material for: Transition-metal-mediated activation of the heptaarsenide trianion: isolation of a diaryltetraarsenabutadienediide
Source: Royal Society of Chemistry journal article supplement (doi:10.1039/c2cc36888a), 2012-01-01
Supplement: c2cc36888a.pdf [file c2cc36888a.pdf]

*Supporting Information*

**Transition-metal-mediated activation of the heptaarsenide trianion:  
Isolation of a diaryltetraarsenabutadienediide**

Caroline M. Knapp, B. H. Westcott, M. A. C. Raybould, J. E. McGrady and J. M. Goicoechea\*

**CONTENTS:**

**1. Experimental section**

**1.1. General synthetic methods**

**1.2. Single crystal X-ray structure determination**

**1.3. Additional characterization techniques**

**2. Computed structures**

**2.1. General computational details**

**2.2. Optimized computed structure**

**2.3. AIM analysis**

**3. NMR spectra**

**4. ESI–MS spectra**

**5. References**

## 1. Experimental section

**1.1. General synthetic methods.** All reactions and product manipulations were carried out under an inert atmosphere using standard Schlenk-line or glovebox techniques (MBraun UNILab glovebox maintained at < 0.1 ppm H<sub>2</sub>O and < 0.1 ppm O<sub>2</sub>). The Zintl phase K<sub>3</sub>As<sub>7</sub> was synthesised according to a previously reported synthetic procedure from a mixture of the elements (K: 99.95%, Strem; As: 99.99%, Alfa-Aesar).<sup>1</sup> [Co(mes)<sub>2</sub>(PEt<sub>2</sub>Ph)<sub>2</sub>] was prepared following the account reported by Chatt and Shaw.<sup>2</sup> Anhydrous CoBr<sub>2</sub> (Co 26.6% min, Alfa Aesar), PEt<sub>2</sub>Ph (98%, Alfa Aesar), Mg turnings (Fisher) and 2-bromomesitylene (99%, Alfa Aesar) were used as received. 2,2,2-crypt (4,7,13,16,21,24-hexaoxa-1,10-diazabicyclo[8.8.8]hexacosane; 99+%, Merck) was also used as received after careful drying under vacuum. Toluene (tol; 99.9%, Rathburn), diethylether (Et<sub>2</sub>O; pesticide residue grade, Fisher) and dimethylformamide (DMF; 99.9%, Rathburn) were purified using an MBraun SPS-800 solvent system. Ethylenediamine (en; 99%, Aldrich), tetrahydrofuran (THF; 99.9%, Rathburn) and pyridine (py; 99+%, Alfa Aesar) were distilled over sodium metal, a sodium metal/benzophenone mixture and CaH<sub>2</sub>, respectively. d<sub>5</sub>-Pyridine (99.5%, Cambridge Isotope Laboratories, Inc.) was dried over CaH<sub>2</sub> and vacuum distilled. All solvents were stored under argon in gas-tight ampoules. In addition toluene, diethylether and THF were stored over activated 3 Å molecular sieves (Acros).

Synthesis of [K(2,2,2-crypt)]<sub>2</sub>[Co(η<sup>3</sup>-As<sub>3</sub>)<sub>2</sub>{η<sup>4</sup>-As<sub>4</sub>(mes)<sub>2</sub>}]·py·0.5tol: To a solution of K<sub>3</sub>As<sub>7</sub> (500 mg, 0.78 mmol) and 2,2,2-crypt (585 mg, 1.56 mmol) in en (10 ml), a solution of [Co(mes)<sub>2</sub>(PEt<sub>2</sub>Ph)<sub>2</sub>] (441 mg, 0.70 mmol) in THF (10 ml) was added and the mixture was left to stir under argon for 3 hours. The resulting solution was reduced to dryness under a dynamic vacuum yielding a dark brown residue which was subsequently washed with Et<sub>2</sub>O (30 mL) to remove residual PEt<sub>2</sub>Ph. The solid was dried under vacuum for a further 2 hours to give the product as a dark brown solid (785 mg, 61% yield). Crystals of [K(2,2,2-crypt)]<sub>2</sub>[1]·py·0.5tol suitable for single crystal X-ray diffraction could be grown by allowing a concentrated pyridine solution of the brown solid to diffuse into toluene. Anal. Calcd for C<sub>54</sub>H<sub>94</sub>As<sub>7</sub>CoK<sub>2</sub>N<sub>2</sub>O<sub>12</sub>: C, 39.22; H, 5.73; N, 3.39. Found: C, 38.93; H, 5.55; N, 3.18. <sup>1</sup>H NMR (499.93 MHz, d<sub>5</sub>-pyridine): δ (ppm) 6.77 (s, 2H, C<sub>6</sub>H<sub>2</sub>(CH<sub>3</sub>)<sub>3</sub>), 3.38 (br s, 12H, 2,2,2-crypt), 3.32 (t, 12H, 2,2,2-crypt, <sup>3</sup>J<sub>H-H</sub> = 5 Hz), 2.31 (t, 12H, 2,2,2-crypt, <sup>3</sup>J<sub>H-H</sub> = 5 Hz), 2.18 (s, 3H, *para*-CH<sub>3</sub>), 2.13 (s, 6H, *ortho*-CH<sub>3</sub>). <sup>13</sup>C NMR (125.72 MHz, d<sub>5</sub>-pyridine): δ (ppm) 154.8 (*ipso*-aryl), 142.8 (*ortho*-aryl), 131.7 (*para*-aryl), 127.6 (*meta*-aryl), 70.9 (2,2,2-crypt), 68.1 (2,2,2-crypt), 54.3 (2,2,2-crypt), 30.7 (*ortho*-CH<sub>3</sub>), 21.4 (*para*-CH<sub>3</sub>). ESI-MS (–ve ion mode; DMF): *m/z* 702.4 [CoAs<sub>7</sub>(mes)]<sup>–</sup>, 821.8 [CoAs<sub>7</sub>(mes)<sub>2</sub>]<sup>–</sup>. ESI-MS (+ve ion mode DMF): *m/z* 1653.7 {[K(2,2,2-crypt)]<sub>2</sub>[CoAs<sub>7</sub>(mes)<sub>2</sub>]}<sup>+</sup>, 2068.2 {[K(2,2,2-crypt)]<sub>3</sub>[CoAs<sub>7</sub>(mes)<sub>2</sub>]}<sup>+</sup>.

## 1.2. Single crystal X-ray structure determination

Single crystal X-ray diffraction data were collected using an Oxford Diffraction Supernova dual-source diffractometer equipped with a 135 mm Atlas CCD area detector. Crystals were selected under Paratone-N oil, mounted on micromount loops and quench-cooled using an Oxford Cryosystems open flow N<sub>2</sub> cooling device.<sup>3</sup> Data were collected at 150 K using mirror monochromated Cu Kα radiation (λ = 1.5418 Å) and

processed using the CrysAlisPro package, including unit cell parameter refinement and inter-frame scaling (which was carried out using SCALE3 ABSPACK within CrysAlisPro).<sup>4</sup> Equivalent reflections were merged and diffraction patterns processed with the CrysAlisPro package. The structure was subsequently solved using direct methods, and refined on  $F^2$  using the SHELXL 97-2 package.<sup>5</sup>

[K(2,2,2-crypt)]<sub>2</sub>[Co( $\eta^3$ -As<sub>3</sub>){ $\eta^4$ -As<sub>4</sub>(mes)<sub>2</sub>}]·py·0.5tol: C<sub>62.5</sub>H<sub>103</sub>As<sub>7</sub>CoK<sub>2</sub>N<sub>5</sub>O<sub>12</sub>; M<sub>r</sub> = 1778.07; crystal colour and morphology: thin yellow plates; crystal size: 0.10 × 0.06 × 0.01 mm; triclinic; space group:  $P\bar{1}$ ;  $a$  = 13.1075(4) Å;  $b$  = 13.6595(4) Å;  $c$  = 24.3451(8) Å;  $\alpha$  = 78.450(3)°;  $\beta$  = 84.386(3)°;  $\gamma$  = 62.288(3)°;  $V$  = 3780.6(2) Å<sup>3</sup>;  $Z$  = 2;  $T$  = 150(2) K;  $\rho_{\text{calcd}}$  = 1.562 g cm<sup>-3</sup>;  $\mu$  = 6.635 mm<sup>-1</sup>; 56712 reflections collected; 13342 independent reflections;  $R_{\text{int}}$  = 0.1252;  $R1$  = 6.44 and  $R2$  = 17.36 for  $I \geq 2\sigma(I)$ ;  $R1$  = 8.20 and  $R2$  = 18.45 for all data.

### 1.3. Additional characterization techniques

Positive and negative ion mode electrospray mass spectra were recorded on DMF solutions (10–20 µM) on a Masslynx LCT Time of Flight mass spectrometer with a Z-spray source (150°C source temperature, 200°C desolvation temperature, 3.2 kV capillary voltage and 25 V cone voltage). The samples were made up inside a glovebox under an inert atmosphere and rapidly transferred to the spectrometer in an air-tight syringe. Samples were introduced directly with a 1 mL SGE syringe and a syringe pump at 0.6 mL h<sup>-1</sup>.

<sup>1</sup>H and <sup>13</sup>C NMR spectra were acquired at 499.9 and 125.0 MHz, respectively on a Varian Unity-plus 500 NMR spectrometer. <sup>1</sup>H and <sup>13</sup>C spectra are reported relative to TMS and were referenced to the most downfield residual solvent resonance (d<sub>5</sub>-pyridine:  $\delta_{\text{H}}$  8.74 ppm,  $\delta_{\text{C}}$  150.4 ppm).

Elemental analyses were carried out by Stephen Boyer of the London Metropolitan University. Samples (approx. 5 mg) were submitted in sealed Pyrex ampoules.

## 2. Computed structures and analysis of electronic structure

### 2.1 General computational details

All calculations described in this paper were carried out at the DFT level of theory with the Gaussian 03 program.<sup>6</sup> Geometries were fully optimized using the BP86 functional<sup>7</sup> in conjunction with a def-TZVP basis on Co and As<sup>8</sup> and a def-SVP basis on C and H.<sup>9</sup> A polarisable continuum with  $\epsilon$  = 78.4 was included in the model to mimic the confining effects of the crystal lattice.  $C_s$  symmetry was imposed in all calculations. Topological properties of electronic densities were characterised using the Atoms In Molecules (AIM) theory of Bader with the AIM2000 program.<sup>10,11</sup>

2.2. Optimized computed structure

**Table S1:** Interatomic distances [Å] and bond angles [°] for the  $[\text{Co}(\eta^3\text{-As}_3)\{\eta^4\text{-As}_4(\text{mes})_2\}]^{2-}$  (**1**) cluster anion crystallographically characterized in  $[\text{K}(2,2,2\text{-crypt})]_2[\textbf{1}]\cdot\text{py}\cdot 0.5\text{tol}$  and for the optimized computed structure. Numbering scheme as used in Figure 1.

| Distance     | <b>1</b>  | <b>1<sub>DFT</sub></b> |
|--------------|-----------|------------------------|
| Co1–As1      | 2.467(1)  | 2.49                   |
| Co1–As2      | 2.379(1)  | 2.41                   |
| Co1–As3      | 2.394(1)  | 2.41                   |
| Co1–As4      | 2.449(1)  | 2.49                   |
| Co1–As5      | 2.364(1)  | 2.40                   |
| Co1–As6      | 2.393(1)  | 2.44                   |
| Co1–As7      | 2.415(1)  | 2.44                   |
| As1–As2      | 2.373(1)  | 2.42                   |
| As2–As3      | 2.395(1)  | 2.43                   |
| As3–As4      | 2.386(1)  | 2.42                   |
| As5–As6      | 2.375(1)  | 2.43                   |
| As5–As7      | 2.381(1)  | 2.43                   |
| As6–As7      | 2.387(2)  | 2.42                   |
| As1–C1       | 2.006(6)  | 2.02                   |
| As4–C11      | 2.019(6)  | 2.01                   |
| As1–As4      | 3.132(1)  | 3.23                   |
| <b>Angle</b> |           |                        |
| C1–As1–As2   | 98.44(17) | 101.8                  |
| As1–As2–As3  | 97.02(3)  | 99.5                   |
| As2–As3–As4  | 100.66(3) | 99.5                   |
| As3–As4–C11  | 94.70(17) | 101.8                  |
| As5–As6–As7  | 60.01(4)  | 60.2                   |
| As6–As7–As5  | 59.74(4)  | 60.2                   |
| As7–As5–As6  | 60.26(5)  | 59.6                   |

**Optimised cartesian coordinates [Å] for 1<sub>DFT</sub>**

| Atom | x            | y            | z            |
|------|--------------|--------------|--------------|
| Co   | 0.284423000  | -0.582254000 | 0.000000000  |
| As   | -1.078731000 | 0.736146000  | 1.613613000  |
| As   | -1.535941000 | -1.603681000 | 1.214477000  |
| As   | -1.535941000 | -1.603681000 | -1.214477000 |
| As   | -1.078731000 | 0.736146000  | -1.613613000 |
| As   | 2.615560000  | -0.007559000 | 0.000000000  |
| As   | 1.870623000  | -1.980333000 | 1.208639000  |
| As   | 1.870623000  | -1.980333000 | -1.208639000 |
| C    | -0.596930000 | 0.735152000  | -3.569190000 |
| C    | -1.463872000 | 0.217948000  | -4.582721000 |
| C    | 0.569883000  | 1.453369000  | -3.977638000 |
| C    | -1.109613000 | 0.356765000  | -5.942923000 |
| C    | 0.884158000  | 1.562895000  | -5.350872000 |
| C    | 0.070121000  | 1.007491000  | -6.356415000 |
| H    | -1.791999000 | -0.053182000 | -6.708724000 |
| H    | 1.795678000  | 2.114652000  | -5.641669000 |
| C    | -0.596930000 | 0.735152000  | 3.569190000  |
| C    | 0.569883000  | 1.453369000  | 3.977638000  |
| C    | -1.463872000 | 0.217948000  | 4.582721000  |
| C    | 0.884158000  | 1.562895000  | 5.350872000  |
| C    | -1.109613000 | 0.356765000  | 5.942923000  |
| C    | 0.070121000  | 1.007491000  | 6.356415000  |
| H    | 1.795678000  | 2.114652000  | 5.641669000  |
| H    | -1.791999000 | -0.053182000 | 6.708724000  |
| C    | 0.444190000  | 1.100536000  | -7.819771000 |
| H    | 1.170212000  | 1.918035000  | -8.005753000 |
| H    | 0.914623000  | 0.157678000  | -8.178269000 |
| H    | -0.444874000 | 1.275785000  | -8.460926000 |
| C    | 0.444190000  | 1.100536000  | 7.819771000  |
| H    | 0.914623000  | 0.157678000  | 8.178269000  |
| H    | 1.170212000  | 1.918035000  | 8.005753000  |
| H    | -0.444874000 | 1.275785000  | 8.460926000  |
| C    | 1.471187000  | 2.144782000  | 2.978564000  |
| H    | 2.329601000  | 2.634263000  | 3.481492000  |
| H    | 1.858627000  | 1.435811000  | 2.214813000  |
| H    | 0.920557000  | 2.926325000  | 2.409079000  |
| C    | 1.471187000  | 2.144782000  | -2.978564000 |
| H    | 1.858627000  | 1.435811000  | -2.214813000 |
| H    | 2.329601000  | 2.634263000  | -3.481492000 |
| H    | 0.920557000  | 2.926325000  | -2.409079000 |
| C    | -2.782814000 | -0.452544000 | 4.261662000  |
| H    | -2.637741000 | -1.449124000 | 3.791756000  |
| H    | -3.391235000 | -0.593405000 | 5.177975000  |
| H    | -3.373267000 | 0.141401000  | 3.532033000  |
| C    | -2.782814000 | -0.452544000 | -4.261662000 |
| H    | -3.391235000 | -0.593405000 | -5.177975000 |
| H    | -2.637741000 | -1.449124000 | -3.791756000 |
| H    | -3.373267000 | 0.141401000  | -3.532033000 |

### 2.3. AIM analysis of the computed electron density.

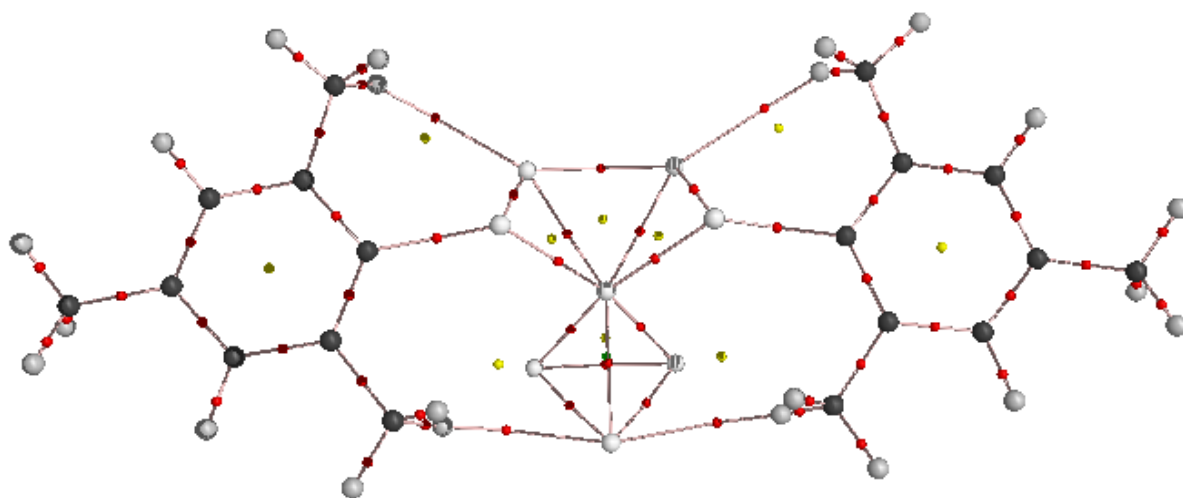

**Figure S1:** Molecular graph for **1<sub>DFT</sub>**.

**Table S2:** Selected electron densities  $\rho(\mathbf{r})$  ( $\text{e au}^{-3}$ ) at the BCPs in **1<sub>DFT</sub>**.

|                |       |
|----------------|-------|
| <b>As1–As2</b> | 0.085 |
| <b>As2–As3</b> | 0.082 |
| <b>As5–As6</b> | 0.079 |
| <b>As6–As7</b> | 0.081 |
| <b>Co–As1</b>  | 0.057 |
| <b>Co–As2</b>  | 0.066 |
| <b>Co–As5</b>  | 0.069 |
| <b>Co–As6</b>  | 0.064 |

### 3. NMR spectra

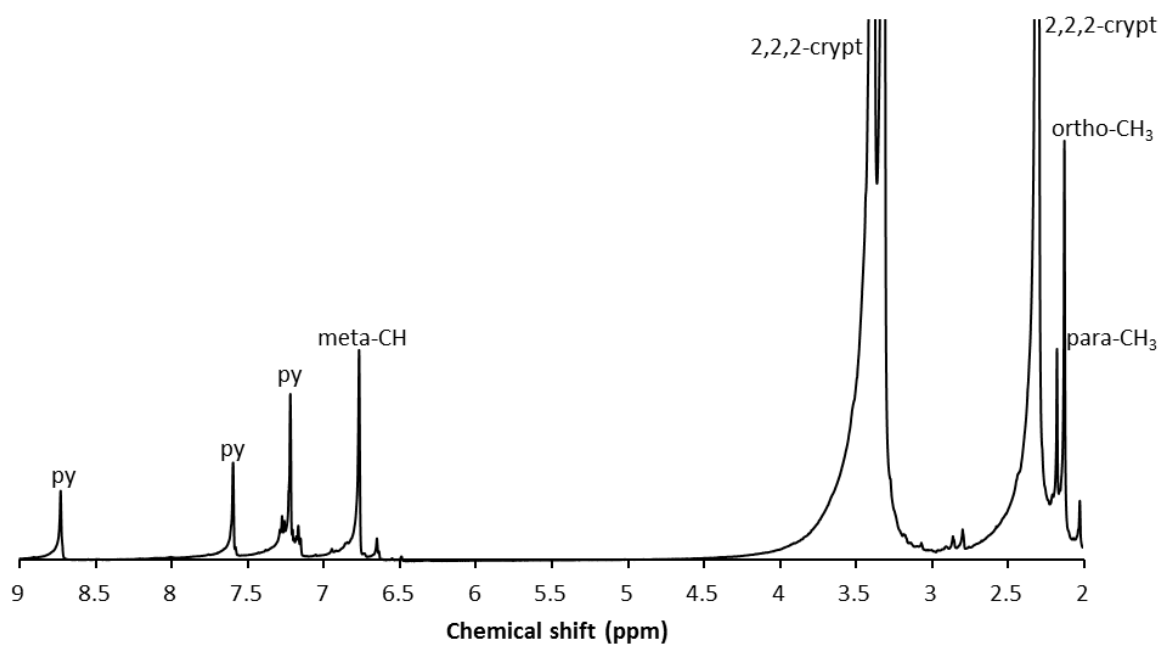

**Figure S2.**  $^1\text{H}$  NMR spectrum of a  $d^5$ -pyridine solution of  $[\text{K}(2,2,2\text{-crypt})]_2[\mathbf{1}] \cdot \text{py} \cdot 0.5\text{tol}$ .

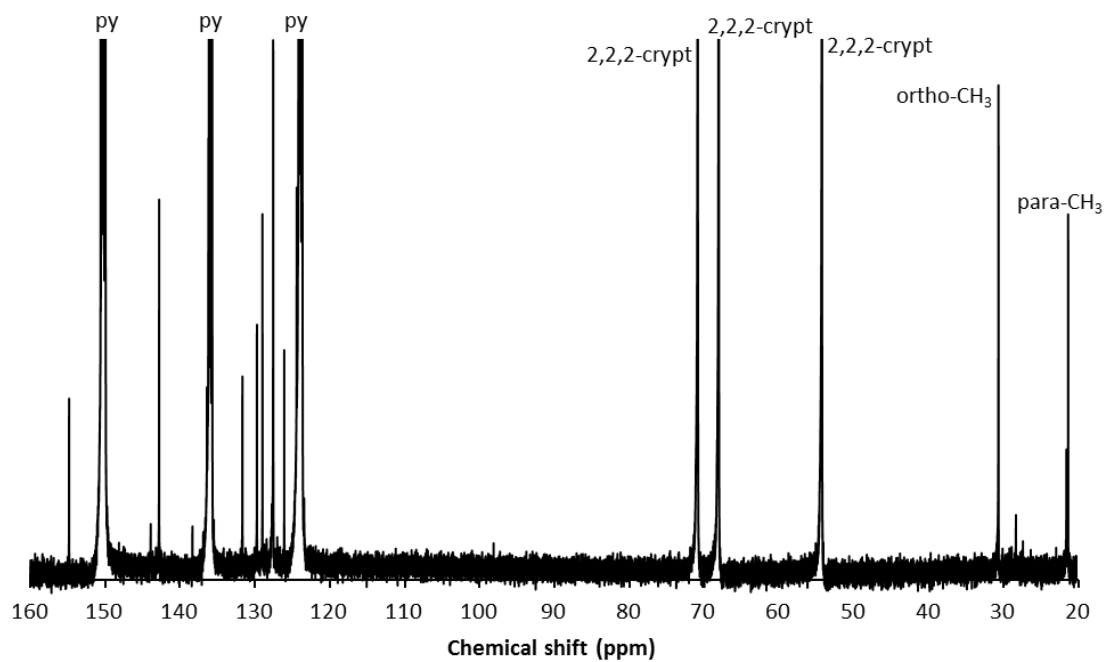

**Figure S3.**  $^{13}\text{C}\{^1\text{H}\}$  NMR spectrum of a  $d^5$ -pyridine solution of  $[\text{K}(2,2,2\text{-crypt})]_2[\mathbf{1}] \cdot \text{py} \cdot 0.5\text{tol}$ .

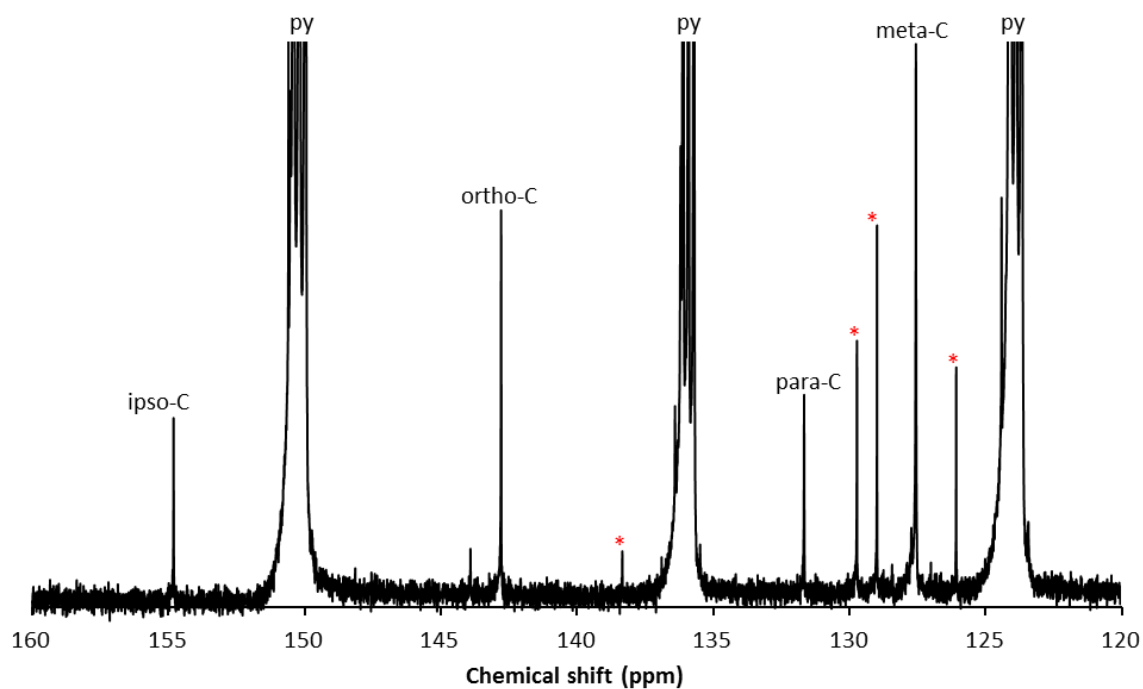

**Figure S4.** Close-up of the aromatic region of the  $^{13}\text{C}\{^1\text{H}\}$  NMR spectrum of  $[\text{K}(2,2,2\text{-crypt})]_2[\mathbf{1}]\cdot\text{py}\cdot 0.5\text{tol}$ . Resonances labelled with a red asterisk correspond to toluene.

#### 4. ESI-MS spectra

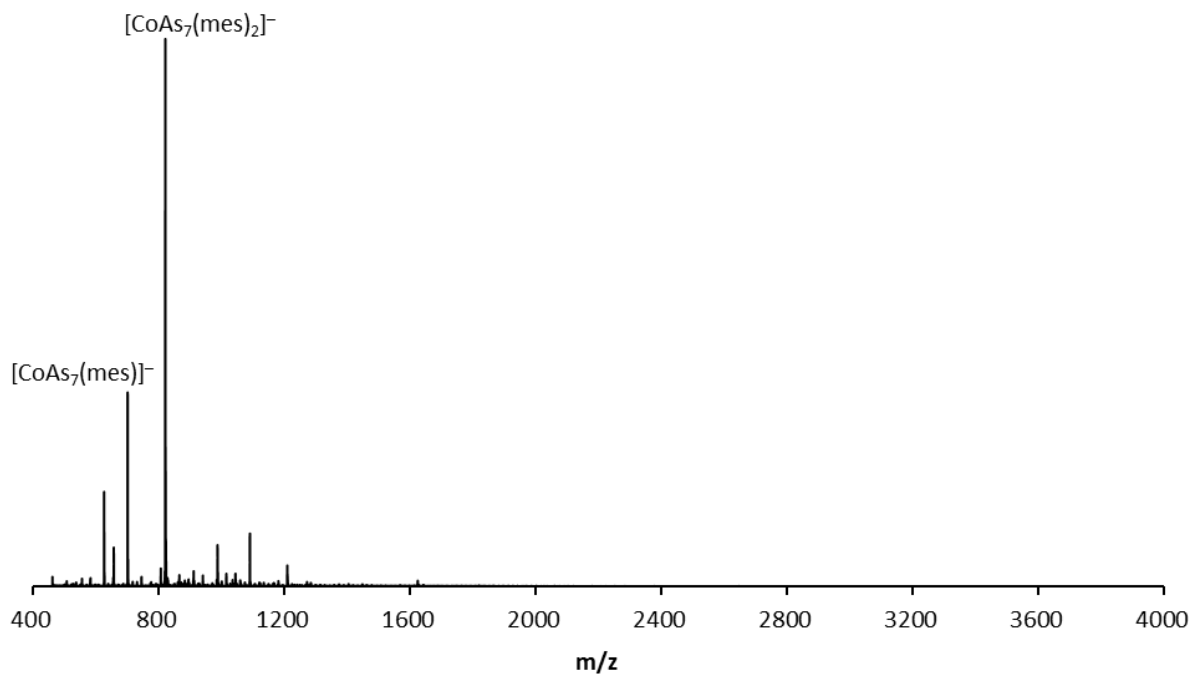

**Figure S5.** Negative ion mode ESI mass spectrum of a DMF solution of  $[\text{K}(2,2,2\text{-crypt})]_2[\mathbf{1}]\cdot\text{py}\cdot 0.5\text{tol}$ .

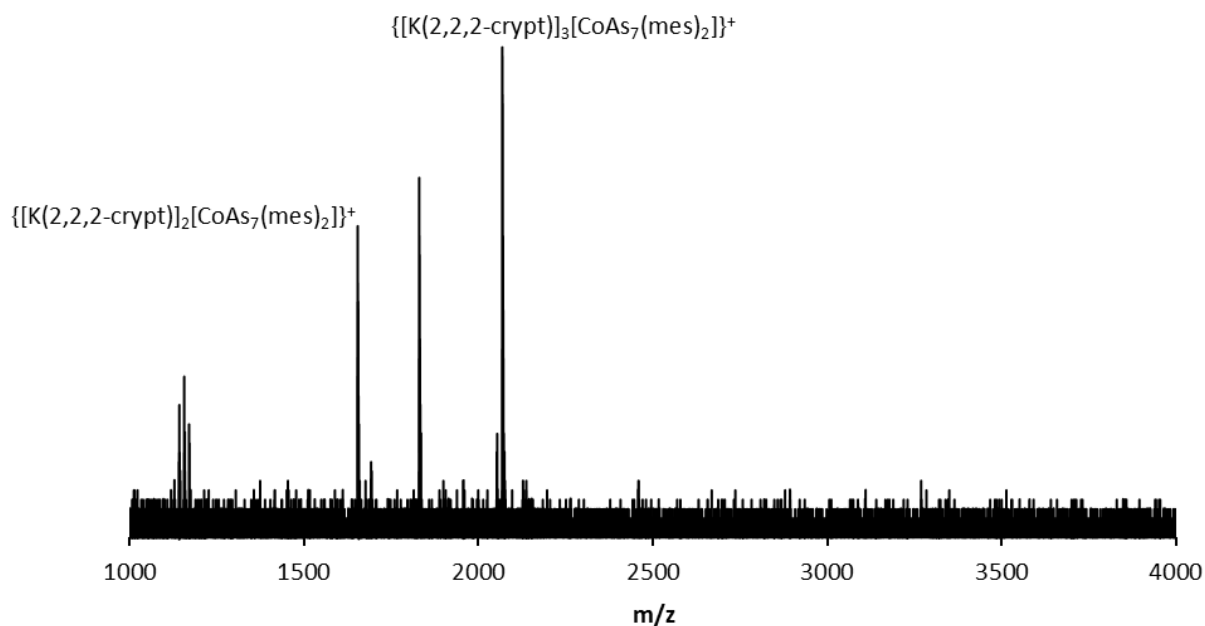

**Figure S6.** Positive ion mode ESI mass spectrum of a DMF solution of  $[K(2,2,2\text{-crypt})]_2[1]\cdot py\cdot 0.5tol$ .

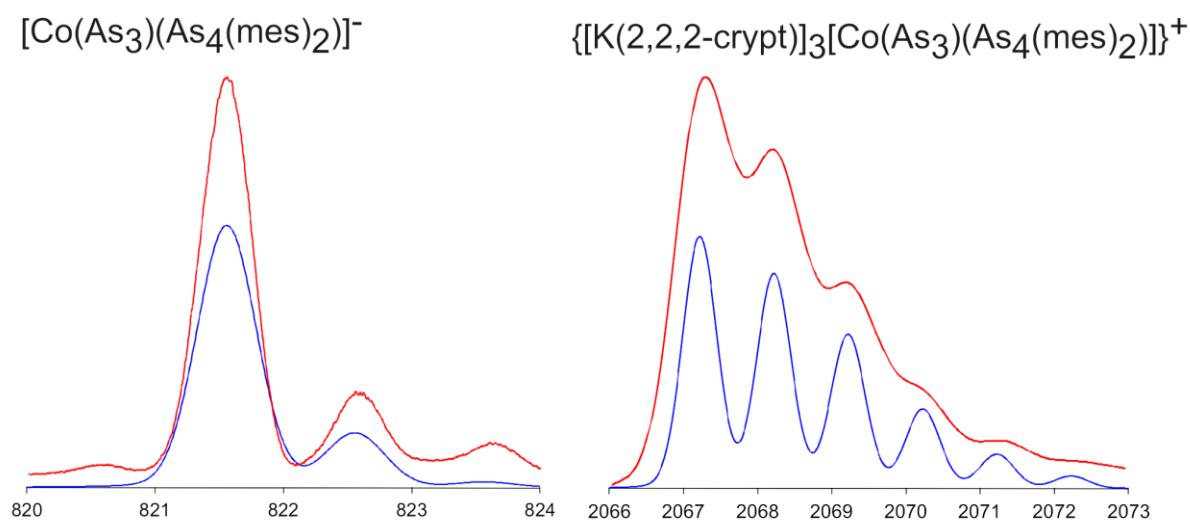

**Figure S7.** Selected mass envelopes from the negative (left) and positive (right) ESI mass spectra of  $[K(2,2,2\text{-crypt})]_2[1]\cdot py\cdot 0.5tol$ . Calculated isotopic distribution patterns are shown in blue while the experimental data are shown in red.

## 5. References

- [1] F. Emmerling and C. Röhr, *Z. Naturforsch., B: J. Chem. Sci.*, 2002, **57(9)**, 963–975.
- [2] J. Chatt and B. L. Shaw, *J. Chem. Soc.*, 1961, 285–290.
- [3] J. Cosier and A. M. Glazer, *J. Appl. Cryst.*, 1986, **19**, 105–107.
- [4] CrysAlisPro, Agilent Technologies, Version 1.171.35.8.

- [5] (a) G. M. Sheldrick, *Acta Cryst.*, 2008, **A64**, 112–122; (b) G. M. Sheldrick, *Acta Crystallogr. Sect. A*, 1990, **46**, 467–473; (c) SHELX97, *Programs for Crystal Structure Analysis (Release 97–2)*, Sheldrick, G. M. University of Göttingen (Germany), 1998.
- [6] Gaussian 09, Revision **A.02**, M. J. Frisch, G. W. Trucks, H. B. Schlegel, G. E. Scuseria, M. A. Robb, J. R. Cheeseman, G. Scalmani, V. Barone, B. Mennucci, G. A. Petersson, H. Nakatsuji, M. Caricato, X. Li, H. P. Hratchian, A. F. Izmaylov, J. Bloino, G. Zheng, J. L. Sonnenberg, M. Hada, M. Ehara, K. Toyota, R. Fukuda, J. Hasegawa, M. Ishida, T. Nakajima, Y. Honda, O. Kitao, H. Nakai, T. Vreven, J. A. Montgomery, Jr., J. E. Peralta, F. Ogliaro, M. Bearpark, J. J. Heyd, E. Brothers, K. N. Kudin, V. N. Staroverov, R. Kobayashi, J. Normand, K. Raghavachari, A. Rendell, J. C. Burant, S. S. Iyengar, J. Tomasi, M. Cossi, N. Rega, J. M. Millam, M. Klene, J. E. Knox, J. B. Cross, V. Bakken, C. Adamo, J. Jaramillo, R. Gomperts, R. E. Stratmann, O. Yazyev, A. J. Austin, R. Cammi, C. Pomelli, J. W. Ochterski, R. L. Martin, K. Morokuma, V. G. Zakrzewski, G. A. Voth, P. Salvador, J. J. Dannenberg, S. Dapprich, A. D. Daniels, Ö. Farkas, J. B. Foresman, J. V. Ortiz, J. Cioslowski, and D. J. Fox, Gaussian, Inc., Wallingford CT, 2009.
- [7] (a) A. D. Becke, *Phys. Rev. A*, 1988, **38**, 3098–3100; (b) J. P. Perdew, *Phys. Rev. B*, 1986, **33**, 8822–8824.
- [8] (a) F. Weigend, M. Häser, H. Patzelt and R. Ahlrichs, *Chem. Phys. Lett.*, 1998, **294**, 143–152; (b) F. Weigend and R. Ahlrichs, *Phys. Chem. Chem. Phys.*, 2005, **7**, 3297.
- [9] A. Schäfer, H. Horn and R. Ahlrichs, *J. Chem. Phys.*, 1992, **97**, 2571–2577.
- [10] R. F. W. Bader, *Atoms in Molecules: A Quantum Theory*. Clarendon Press: Oxford. UK, 1990.
- [11] F. Biegler-König, J. Schönbohm, *AIM2000, version 2.0*, Büro für Innovative Software, 2002.
